# Supplementary material for: Effects of trauma mattress on dose and image quality of paediatric whole-body computed tomography examinations
Source: Research Square preprint supplement (doi:10.21203/rs.3.rs-6492636/v1), 2025-05-15
Supplement: Supplementary file 1 [file d2c8b16c3ac8e52774546625.docx]

**QUALITY CONTROL TESTS RESULTS**

**Supplementary 1: Dose Measurements**

| Collimation | SFOV | kVp | CTDI free in air (mGy) | Deviation |
| --- | --- | --- | --- | --- |
| **GE Scanner** | | | | |
| 64 x 0.625 | 40 | 70 | 72.4 | 1.0% |
| 64 x 0.625 | 40 | 80 | 105.3 | 0.9% |
| 64 x 0.625 | 40 | 100 | 196.0 | 0.9% |
| 64 x 0.625 | 40 | 120 | 317.7 | 1.3% |
| 64 x 0.625 | 40 | 140 | 459.3 | 1.5% |
| 64 x 0.624 | 40 | 120 | 398.1 | 1.6% |
| 64 x 0.625 | 40 | 120 | 397.5 | 1.8% |
| 8 x 0.625 | 5 | 120 | 67.8 | 4.9% |
| 128 x 0.625 | 80 | 120 | 550.0 | -14.9% |
| **Siemens Scanner** | | | | |
| 64 x 0.625 | 38.4 | 70 | 4.7 | -2.7% |
| 64 x 0.625 | 38.4 | 80 | 7.1 | -0.5% |
| 64 x 0.625 | 38.4 | 100 | 14.0 | 0.2% |
| 64 x 0.625 | 38.4 | 120 | 22.7 | -0.5% |
| 64 x 0.625 | 38.4 | 140 | 33.6 | -0.7% |
| 32 x 1.2 | 38.4 | 120 | 22.9 | -0.2% |
| 12 x 1.2 | 14.4 | 120 | 26.3 | -0.2% |
| 1 x 10 | 10 | 120 | 20.4 | -0.3% |
| 1 x 5 | 5 | 120 | 20.3 | 0.5% |
| 2 x 1 | 2 | 120 | 21.8 | 0.2% |
| 12 x 1.2 | 14.4 | 120 | 84.4 | -0.5% |
| 1 x 10 | 10 | 120 | 65.6 | -0.6% |
| 1 x 5 | 5 | 120 | 65.2 | -0.2% |

**Supplementary 2:** **Noise Measurements in Catphan 500 for Helical Protocol**

|  | GE Scanner | | | Siemens Scanner | | |
| --- | --- | --- | --- | --- | --- | --- |
| Protocol | Measured Noise (HU) | Established Value, Noise (HU) | Deviation from Established Value | Measured Noise (HU) | Established Value, Noise (HU) | Deviation from Established Value |
| Helical, 5 mm section | 6.1 | 6.3 | -4.3% | 4.3 | 4.3 | 0.0% |

**Supplementary 3: Deviation between Measured and Nominal Values of CT Numbers for Helical Recording**

| Helical Recording | GE Scanner | | | | Siemens Scanner | | | |
| --- | --- | --- | --- | --- | --- | --- | --- | --- |
| Teflon | Acrylic | LDPE | Air | Teflon | Acrylic | LDPE | Air |
| Measured Value (M) | 969 | 118 | -97 | -998 | 938 | 125 | -91 | -995 |
| Established Values (E) (2020) | 892 | 115 | -98 | -999 | 936 | 125 | -92 | -1000 |
| Nominal Values (N), 120 kVp | 990 | 120 | -100 | -1000 | 990 | 120 | -100 | -1000 |
| Deviation from E | 8.63% | 2.61% | -1.02% | -0.1% | 0.21% | 0.00% | -1.09% | -0.5% |
| Deviation from N | -2.12% | -1.67% | -3.00% | -0.2% | -5.25% | 4.17% | -9.00% | -0.5% |

**Supplementary 4: CT number linearity**

1. **GE Scanner**
2. **Siemens Scanner**

**Supplementary 5: Homogeneity Measured in Catphan 500**

The Table shows the average difference in CT numbers between peripheral ROI and ROI in the centre of module CTP486.

|  | Helical 5 mm (GE Scanner) | Helical 5 mm (Siemens Scanner) |
| --- | --- | --- |
| CT Number (HU), Centre | 8.7 | 14.4 |
| Deviation HU at 12 | 0.0 | 0.4 |
| Deviation HU at 15 | 0.1 | 0.4 |
| Deviation HU at 18 | 0.1 | 0.4 |
| Deviation HU at 21 | 0.1 | 0.4 |
| Maximum Deviation (HU) | 0.8 | 0.96 |
